# Supplementary material
Source: PubMed Central journal article supplement (PMC10073335)
Supplement: NIHMS1871648-supplement-1.pdf [file NIHMS1871648-supplement-1.pdf]

# MSK - IMPACT

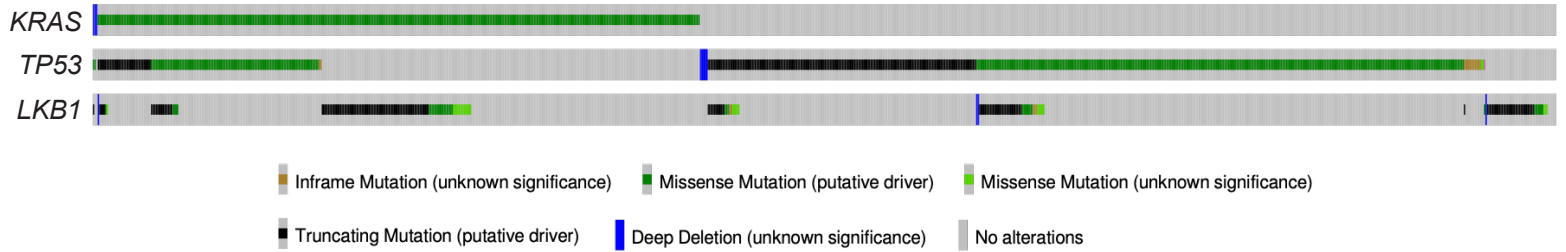

**B** **KRAS Mutant**

Odds Ratio: 0.31  
P-value:  $1.44 \times 10^{-6}$

|      |     | TP53 |     |
|------|-----|------|-----|
|      |     | WT   | Mut |
| LKB1 | WT  | 155  | 122 |
|      | Mut | 103  | 25  |

**KRAS WT**

Odds Ratio: 1.13  
P-value: 0.56

|      |     | TP53 |     |
|------|-----|------|-----|
|      |     | WT   | Mut |
| LKB1 | WT  | 348  | 481 |
|      | Mut | 48   | 75  |

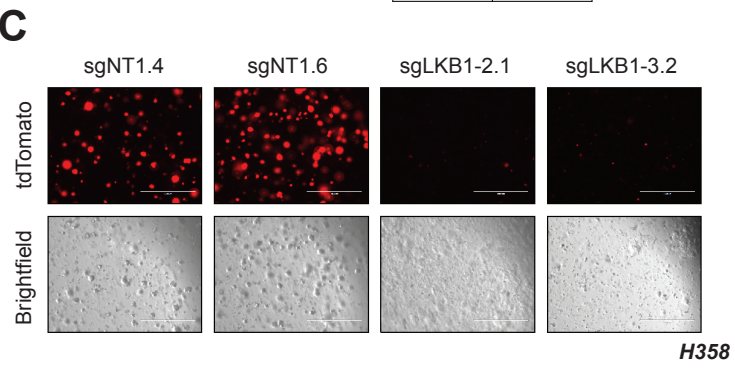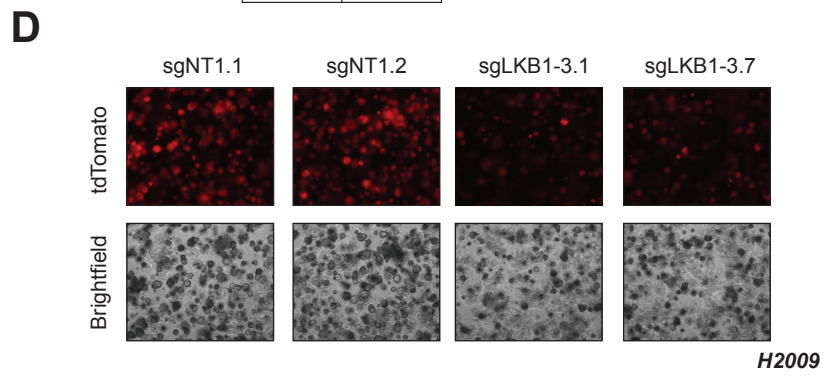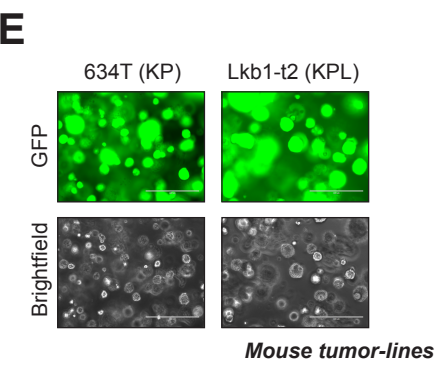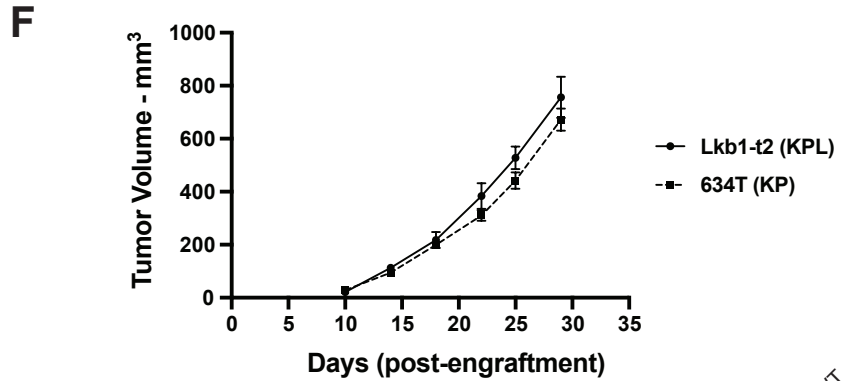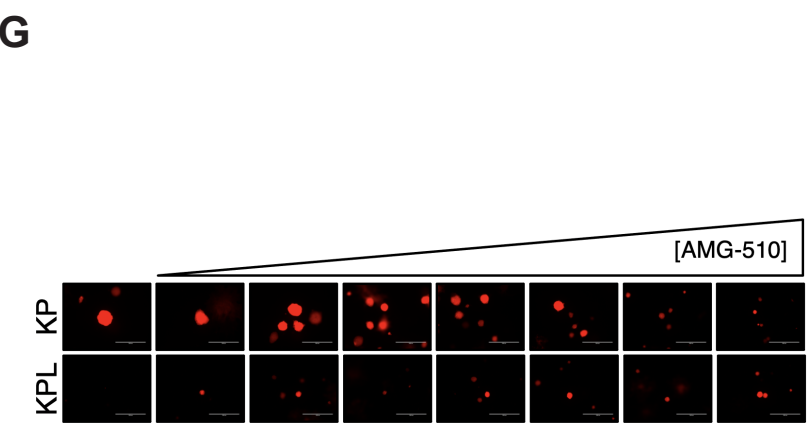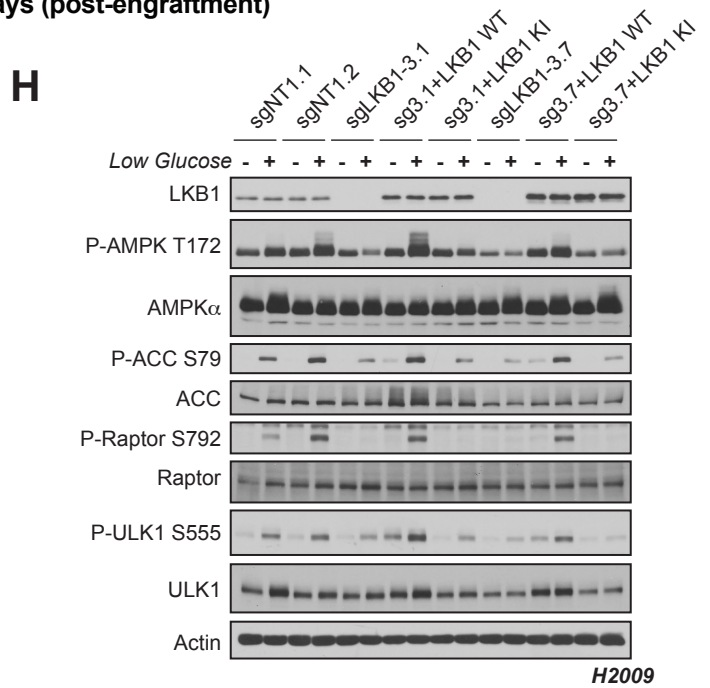

Figure S1

**Figure S1. Differential co-occurrence and effects of *KRAS*, *TP53* and *LKB1* mutations on human and mouse LUADs**

**(A)** MSK Impact oncoprint of co-occurrence of *KRAS*, *TP53* and *LKB1* mutations in human lung adenocarcinomas, with Fisher's exact test of statistical likelihood of co-occurrence of *LKB1* and *TP53* mutations in a LUAD with a *KRAS* mutant or wildtype background. **(B)** Fisher's exact test of statistical likelihood of co-occurrence of *LKB1* and *TP53* mutations in a *KRAS* mutant or wildtype background respectively. **(C)** 3D spheroid growth in Matrigel of isogenic clones of the H358 cell line labeled with a tdTomato fluorescent reporter and expressing CAS9 and non-targeting controls (sgNT1.4 and sgNT1.6) or *LKB1*-specific (sgLKB1-2.1 and sgLKB1-3.2) guide RNAs. 5,000 cells were seeded into Matrigel and grown for 10 days in media changed every 24 hours. Images taken on EVOS fluorescence microscope under 4x magnification and filter to resolve tdTomato signal intensity and brightfield. **(D)** 3D spheroid growth in Matrigel of isogenic clones of the H2009 cell line labeled with a tdTomato fluorescent reporter and expressing CAS9 and non-targeting controls (sgNT1.1 and sgNT1.2) or *LKB1*-specific (sgLKB1-3.1 and sgLKB1-3.7) guide RNAs. 5,000 cells were seeded into Matrigel and grown for 10 days in media changed every 24 hours. Images taken on Nikon fluorescence microscope under 4x magnification and filter to resolve tdTomato signal intensity and brightfield. **(E)** 3D spheroid growth in Matrigel of GEMM-derived mLUAD cell lines containing transgenic lentiviral expression of GFP under control of a CMV promoter. 5,000 cells were seeded into Matrigel and assay was conducted for 10 days in culture media changed every 24 hours. Images taken on EVOS fluorescence microscope under 10x magnification and filter to resolve GFP signal intensity and brightfield. **(F)** Mean ( $\pm$  s.e.m.) volumes of mouse 634T (KP) and *Lkb1*-t2 (KPL) lung adenocarcinoma allograft tumors.  $1 \times 10^4$  cells implanted in right hind flank ( $n = 10$  per cohort). **(G)** 3D spheroid growth in Matrigel of isogenic clones of the H358 cell line labeled with a tdTomato fluorescent reporter and expressing Cas9 and non-targeting controls (sgNT1.6) or *LKB1*-specific (sgLKB1-3.2) guide RNAs. 1,000 cells were seeded into Matrigel and grown for 14 days in media changed every 72 hours with addition of fresh AMG-510. Dose range for AMG-510 was 1 nM – 1  $\mu$ M. Images taken on EVOS fluorescence microscope under 4x magnification and filter to resolve tdTomato signal intensity. **(H)** Western blot analysis of H2009 (*KRAS*; *TP53*) isogenic clones (KP: sgNT1.1 and sgNT1.2; KPL: sgLKB1-3.1 and sgLKB1-3.7) and lines with additional transgenic expression of guide RNA resistant *LKB1* wildtype (WT) (sgLKB1-3.1 + *LKB1* WT and sgLKB1-3.7 + *LKB1* WT) or *LKB1* kinase inactive (KI) (sgLKB1-3.1 + *LKB1* KI and sgLKB1-3.7 *LKB1* KI) and treated with 11.1 mM or 0.5 mM glucose for 6 hours as indicated. Restoration of AMPK signaling in *LKB1* WT lines in response to 0.5 mM glucose validated by blotting for P-AMPK Thr172 and downstream substrates (P-ACC S79, P-ULK1 S555, P-Raptor S792). Similar results observed in three independent experiments.
