# Supplementary material
Source: PubMed Central journal article supplement (PMC10073335)
Supplement: NIHMS1871648-supplement-2.pdf [file NIHMS1871648-supplement-2.pdf]

**A**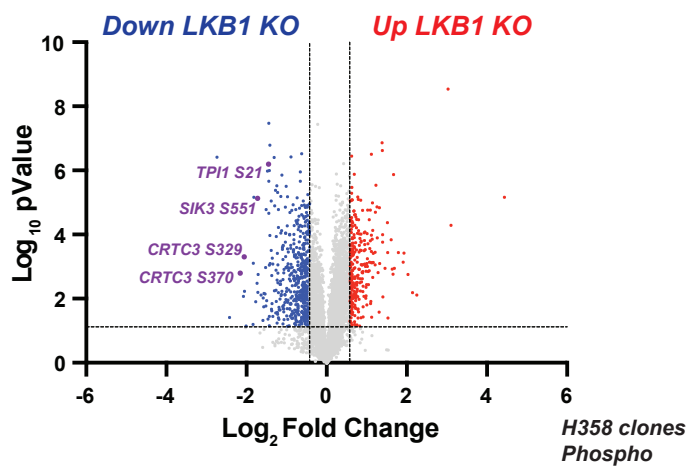**B**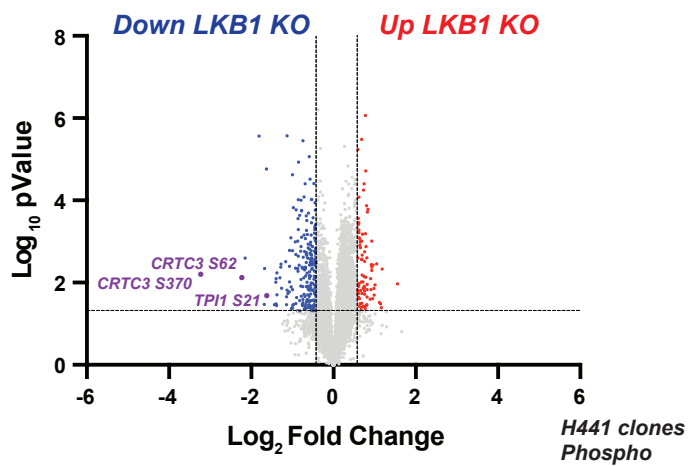**C**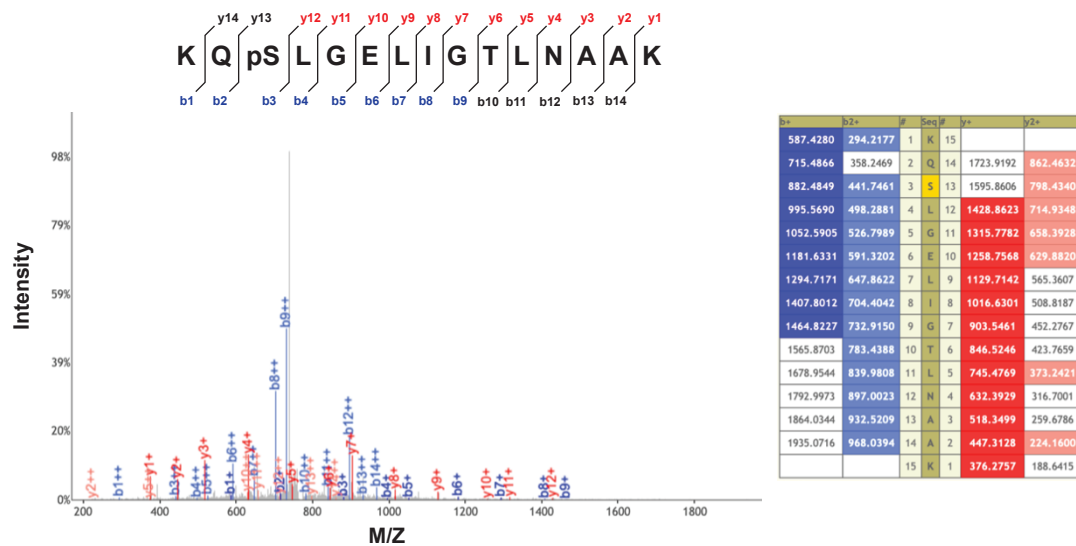**D**

H358 Clones - TPI1 expression

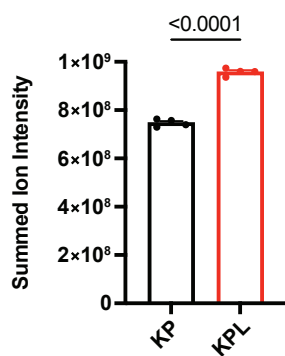**E**

H441 Clones - TPI1 expression

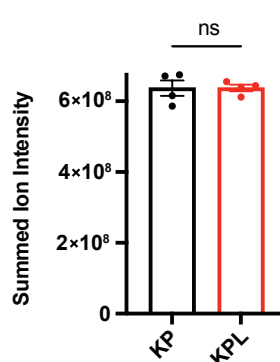

**Figure S2. Phosphorylation of human TPI1 is LKB1-dependent.**

**(A and B)** Volcano plots for comparison of phospho-peptides enriched from lysates of H358 and H441 isogenic cells respectively with and without LKB1 [2 KP clones (H358: sgNT1.4 and sgNT1.6; H441: sgNT1.2 and sgNT1.4) and 2 KPL clones (H358: sgLKB1-2.1 and sgLKB1-3.2. H441: sgLKB1-2.2 and sgLKB1-3.3) with 2 biological replicates for each cell line, N=4 per genotype]. Cells were grown in 0.5 mM glucose for 6 hours before lysis. Phospho-peptides that pass statistical criteria (p-value <0.05) are highlighted in black, red, and blue, peptides that do not satisfy this criterion are colored grey. Phospho-peptides highlighted in red satisfy a fold-change threshold (>1.5) upon LKB1 deletion; those highlighted in blue satisfy the fold change threshold (<1.5) upon LKB1 deletion. **(C)** Representative MS/MS spectrum for phospho-peptide of TPI1 containing Ser21. Mapped b+ and y+ ions labeled with blue and red respectively in the spectrum and corresponding mass/charge peaks listed in table format. Cartoon above shows predicted peptide fragmentation with identified b+ and y+ colored blue and red, respectively. **(D and E)** Bar graphs for TPI1 protein expression of summed ion intensities for TPI1 protein expression from companion unenriched total proteomic analyses. Cell-lines treated with 0.5 mM glucose for 6 hr prior to collection. Data presented are representative of 4 independent biological experiments and reported as the mean (-/+s.e.m.). Statistical significance determined by two-tailed paired t-test.
