# Supplementary material
Source: PubMed Central journal article supplement (PMC10073335)
Supplement: NIHMS1871648-supplement-5.pdf [file NIHMS1871648-supplement-5.pdf]

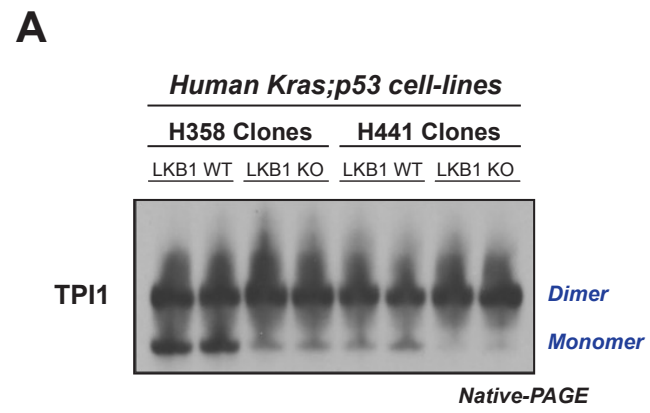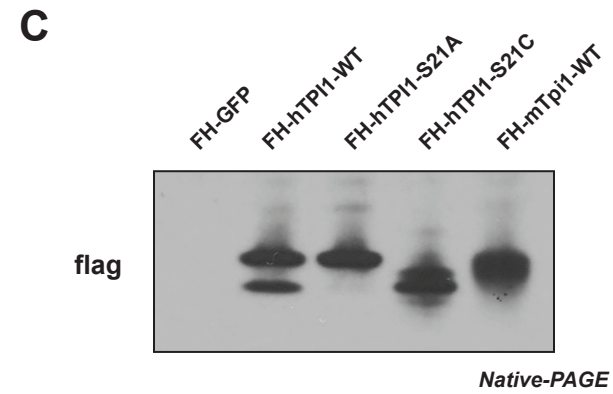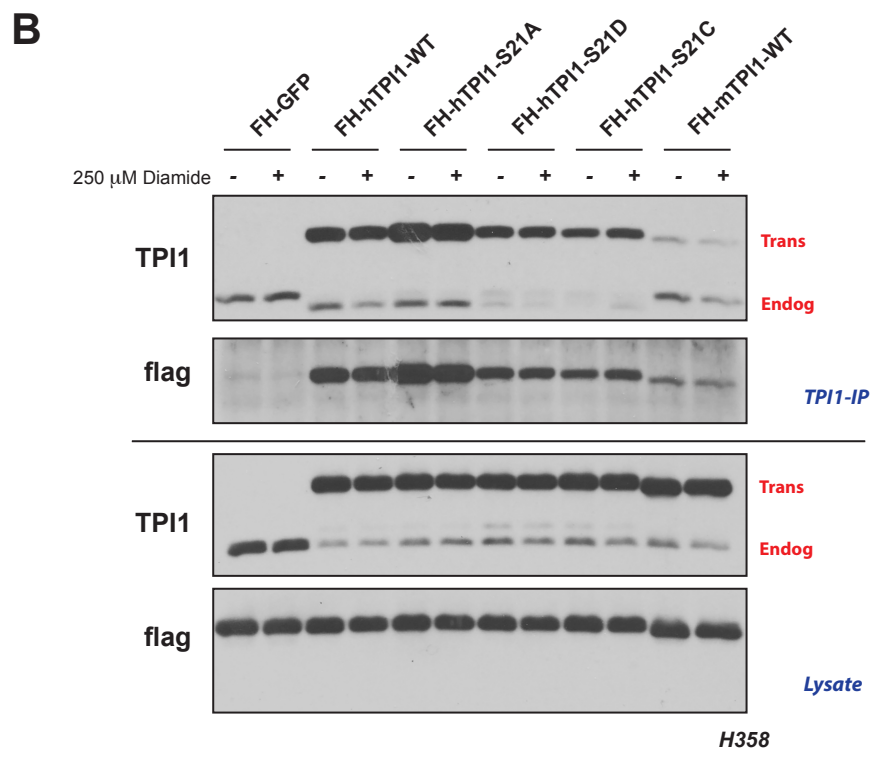

**Figure S5. LKB1 regulates the multimeric state of hTPI1 but not mTpi1 and substitution of Cys in hTPI1 causes formation of a covalent TPI1 dimer.**

**(A)** Western blot analysis of Blue Native PAGE of human isogenic clones derived from H358 and H441 cell lines. Cells were grown under normal conditions (11.1 mM glucose). **(B)** Western blot of proteins co-immunoprecipitated from extracts of H358 cells expressing Cas9 and a non-targeting (FH-GFP cell line) or TPI1-specific (all other cell lines) guide RNA and transgenic expression of Flag-HA tagged GFP or guide RNA resistant TPI1 allelic variants using a polyclonal antibody against full-length TPI1. Cells were cultured in 11.1 mM glucose and treated with 250  $\mu$ M Diamide or vehicle for 15 minutes prior to collection. **(C)** Western blot (Blue Native PAGE) of extracts of H358 cell lines used for co-immunoprecipitation in panel 3F. Cells were cultured in 11.1 mM glucose.
