# Supplementary material
Source: PubMed Central journal article supplement (PMC10073335)
Supplement: NIHMS1871648-supplement-6.pdf [file NIHMS1871648-supplement-6.pdf]

**A****GAP: M+2**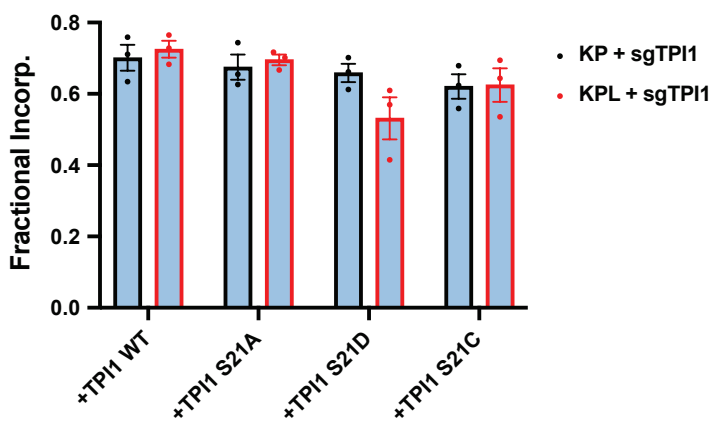**B****F-1,6-BP: M+2**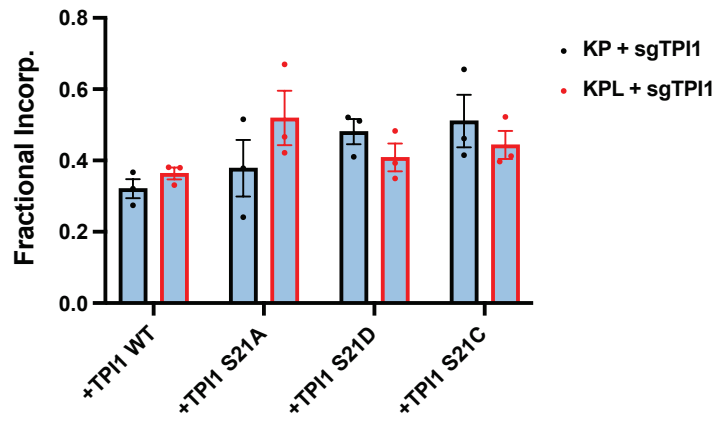**C****2/3-PG: M+2**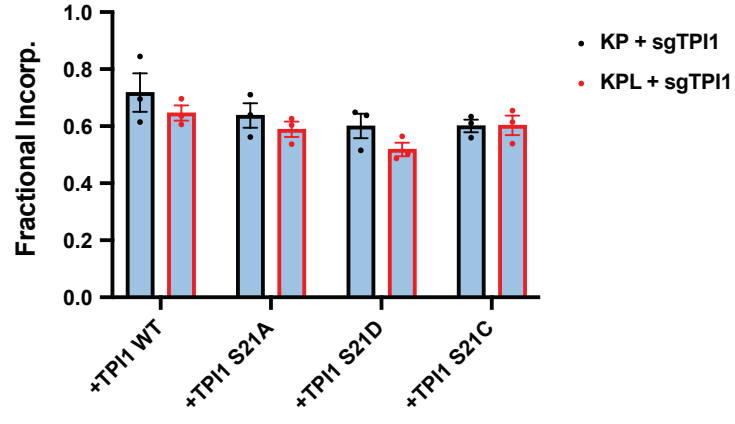**D****6-PG: M+2**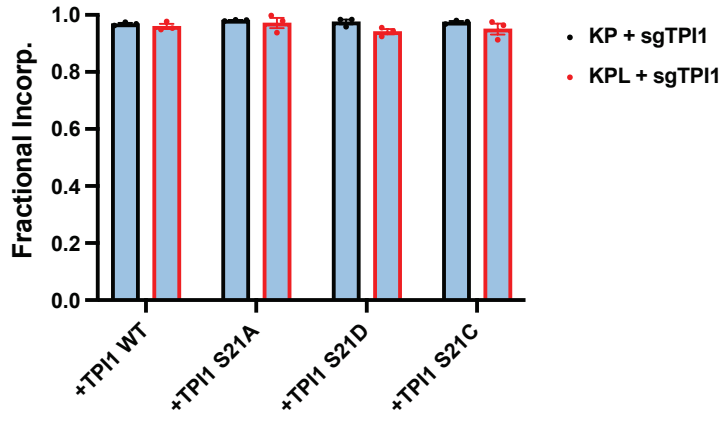**Figure S6**

**Figure S6. TPI1 allelic variants effects central carbon metabolic flux.**

**(A-D)** Isotopic tracing results for M+2 isotopologues for F-1,6-BP, GAP, 3-PG and 6-PG respectively at 0.5 mM for 1 minute. Analysis conducted in H358 isogenic lines (KP: sgNT1.6; KPL: sgLKB1-3.2) with additional expression of sgTPI1 guide RNA and guide RNA resistant TPI1 allelic variants in biological triplicate (N=3 per genotype) and reported as the mean (-/+s.e.m.). Statistical significance determined by two-tailed paired t-test.
